# Supplementary material
Source: publisher site journal article supplement (https://www.dovepress.com/article/386962)
Supplement: Supplementary file 1 [file get_supplementary_file.php]

**Supplementary Materials (Results)**

***Patient disposition***

The analysis included 16,338 patients: approximately 40% initiated TIO/OLO (n=6,681) and 60% initiated FF/UMEC/VI (n=9,657). SMDs between TIO/OLO initiators before (n=3,085; 46.2%) and after FF/UMEC/VI approval (n=3,596; 53.8%) were balanced on all a-priori specified characteristics, except insurance type for which imbalances were not meaningful (data not shown). TIO/OLO and FF/UMEC/VI post-match treatment cohorts included 3,884, 2,552, and 1,774 matched pairs for the GOLD A/B, No exacerbation, and GOLD C/D subgroups, respectively. **(Supplemental Figure 1)**

**Supplemental Figure 1. Patient disposition**

**Inclusion Criteria**

≥30 consecutive days with TIO/OLO or FF/UMEC/VI from 06/01/2015 to 11/30/2019.

Index date defined as date of first pharmacy claim staring the ≥30 consecutive days

**N=53,378**

≥ 1 facility claim with diagnosis code for COPD in primary position or ≥ 2 professional claims with a diagnosis code for COPD in any position on separate dates of service during study period: 06/01/2014 to 12/31/2019

**n=47,731**

≥ 40 years of age as of the year of the index date

**n=47,624**

Continuous enrollment with medical and pharmacy coverage for 12 months prior to index date (baseline period: defined as index date - 364 days through index date) and for ≥ 30 days following the index date without discontinuation or switching (follow-up: defined as index date + 1 through index date + 30 days)

**n=29,475**

**Exclusion Criteria**

≥2 medical claims with a diagnosis code for asthma, cystic fibrosis, lung cancer, or interstitial lung disease, any position, on separate service dates service in baseline period (narrow ILD code list) and pharmacy codes for both TIO/OLO and FF/UMEC/VI on the index date

**n=22,899**

Pharmacy claim for any non-index COPD maintenance medication on index date, defined as LAMA, LABA, ICS monotherapy; fixed dose combination ICS+LABA or LAMA+LABA or ICS+LABA+LAMA

**n=22,589**

Free or fixed dose TT defined as ≥ 7 days of consecutive overlapping days supply with an ICS, LABA, and LAMA during a 6-month baseline period, excluding the index date

**n=18,696**

Free or fixed dose LAMA+LABA maintenance therapy defined as ≥ 7 days of consecutive overlapping days supply with a LAMA and LABA during a 6-month baseline period, excluding the index date

**n=16,389**

≥ 1 medical claim with a procedure code for lung volume reduction

**n=16,350**

Unknown age, gender, or business line, or unknown or other geographic region

**n=16,338**

**GOLD C/D**

TIO/OLO (n=1,843) FF/UMEC/VI (n=3,927)

**GOLD A/B**

TIO/OLO (n=4,838) FF/UMEC/VI (n=5,730)

A/BGOLD A/B

**No Exacerbation (Subset of GOLD A/B)**

TIO/OLO (n = 3,369) FF/UMEC/VI (n=3,453)

**GOLD C/D**

TIO/OLO and FF/UMEC/VI matched pairs **(n=1,774)**

**GOLD A/B**

TIO/OLO and FF/UMEC/VI matched pairs (**n=3,884)**

**No Exacerbation** (Subset of GOLD A/B)

TIO/OLO and FF/UMEC/VI matched pairs **(n=2,552)**

**After Propensity Score Matching**

***Baseline patient characteristics***

**Supplemental Table 1. Clinical and demographics characteristics at baseline (pre-match)**

| **Characteristics** | **GOLD A/B** | | | **No Exacerbation (Subgroup of GOLD A/B)** | | | **GOLD C/D** | | |
| --- | --- | --- | --- | --- | --- | --- | --- | --- | --- |
|  | **TIO/OLO** | **FF/UMEC/VI** | **Standardized**  **Mean Difference** | **TIO/OLO** | **FF/UMEC/VI** | **Standardized**  **Mean Difference** | **TIO/OLO** | **FF/UMEC/VI** | **Standardized**  **Mean**  **Difference** |
| **(N=4,838)** | **(N=5,730)** | **(N=3,369)** | **(N=3,453)** | **(N=1,843)** | **(N=3,927)** |
| **Age (continuous), years, mean (SD)** | 72.01 (8.57) | 70.32 (9.27) | 18.92 | 72.22 (8.59) | 70.47 (9.25) | 19.60 | 71.79 (8.67) | 70.64 (8.93) | 13.05 |
| **Age group, n (%)** |  |  |  |  |  |  |  |  |  |
| 40-49 | 64 (1.32) | 90 (1.57) | -2.08 | 43 (1.28) | 57 (1.65) | -3.12 | 17 (0.92) | 53 (1.35) | -4.03 |
| 50-59 | 383 (7.92) | 658 (11.48) | -12.07 | 262 (7.78) | 381 (11.03) | -11.18 | 148 (8.03) | 411 (10.47) | -8.41 |
| 60-64 | 378 (7.81) | 829 (14.47) | -21.27 | 256 (7.60) | 492 (14.25) | -21.44 | 202 (10.96) | 529 (13.47) | -7.67 |
| 65-69 | 874 (18.07) | 931 (16.25) | 4.82 | 587 (17.42) | 543 (15.73) | 4.57 | 301 (16.33) | 681 (17.34) | -2.70 |
| 70-74 | 1,213 (25.07) | 1,263 (22.04) | 7.15 | 849 (25.20) | 776 (22.47) | 6.40 | 463 (25.12) | 842 (21.44) | 8.72 |
| 75+ | 1,926 (39.81) | 1,959 (34.19) | 11.66 | 1,372 (40.72) | 1,204 (34.87) | 12.10 | 712 (38.63) | 1,411 (35.93) | 5.59 |
| **Gender, n (%)** |  |  |  |  |  |  |  |  |  |
| Female | 2,408 (49.77) | 2,782 (48.55) | 2.44 | 1,625 (48.23) | 1,635 (47.35) | 1.77 | 968 (52.52) | 2,131 (54.27) | -3.49 |
| **Region, n (%)** |  |  |  |  |  |  |  |  |  |
| Northeast | 674 (13.93) | 622 (10.86) | 9.35 | 481 (14.28) | 420 (12.16) | 6.24 | 211 (11.45) | 453 (11.54) | -0.27 |
| Midwest | 1,039 (21.48) | 1,358 (23.70) | -5.32 | 715 (21.22) | 821 (23.78) | -6.12 | 433 (23.49) | 899 (22.89) | 1.43 |
| South | 2,702 (55.85) | 3,398 (59.30) | -6.99 | 1,857 (55.12) | 1,993 (57.72) | -5.24 | 1,067 (57.89) | 2,383 (60.68) | -5.68 |
| West | 423 (8.74) | 352 (6.14) | 9.92 | 316 (9.38) | 219 (6.34) | 11.30 | 132 (7.16) | 192 (4.89) | 9.56 |
| **Resource-scarce areaa, n (%)** | 1,078 (22.28) | 1,356 (23.66) | -3.29 | 753 (22.35) | 842 (24.38) | -4.81 | 444 (24.09) | 858 (21.85) | 5.33 |
| **Insurance type, n (%)** |  |  |  |  |  |  |  |  |  |
| Commercial | 264 (5.46) | 1,042 (18.18) | -40.21 | 191 (5.67) | 624 (18.07) | -39.07 | 70 (3.80) | 535 (13.62) | -35.38 |
| Medicare Advantage with Part D | 4,574 (94.54) | 4,688 (81.82) | 40.21 | 3,178 (94.33) | 2,829 (81.93) | 39.07 | 1,773 (96.20) | 3,392 (86.38) | 35.38 |
| **Race/ethnicity, n (%)** |  |  |  |  |  |  |  |  |  |
| Non-Hispanic White | 3,368 (69.62) | 3,942 (68.80) | 1.78 | 2,331 (69.19) | 2,366 (68.52) | 1.45 | 1,331 (72.22) | 2,714 (69.11) | 6.83 |
| Non-Hispanic Black | 611 (12.63) | 709 (12.37) | 0.77 | 436 (12.94) | 425 (12.31) | 1.91 | 242 (13.13) | 493 (12.55) | 1.72 |
| Non-Hispanic Asian | 85 (1.76) | 64 (1.12) | 5.38 | 55 (1.63) | 39 (1.13) | 4.31 | 17 (0.92) | 49 (1.25) | -3.14 |
| Hispanic | 323 (6.68) | 290 (5.06) | 6.88 | 238 (7.06) | 188 (5.44) | 6.69 | 98 (5.32) | 177 (4.51) | 3.75 |
| Other/unknown race | 451 (9.32) | 725 (12.65) | -10.67 | 309 (9.17) | 435 (12.60) | -11.02 | 155 (8.41) | 494 (12.58) | -13.64 |
| **Baseline Charlson comorbidity score excluding COPDb (continuous), mean (SD)** | 1.50 (1.75) | 1.43 (1.70) | 4.38 | 1.49 (1.76) | 1.40 (1.71) | 5.57 | 2.27 (2.11) | 2.15 (2.02) | 5.38 |
| **Baseline Elixhauser comorbidity score excluding COPDc (continuous), mean (SD)** | 6.15 (8.43) | 5.69 (8.24) | 5.50 | 6.12 (8.41) | 5.60 (8.23) | 6.20 | 11 (10.50) | 10.32 (10.44) | 6.58 |
| **COPD severity scored (continuous), mean (SD)** | 26.45 (6.13) | 27.75 (7.38) | -19.27 | 25.93 (5.81) | 26.96 (7.08) | -15.84 | 34.95 (10.88) | 36.89 (11.85) | -17.05 |
| **Baseline comorbidities, n (%)** |  |  |  |  |  |  |  |  |  |
| Depression | 1,071 (22.14) | 1,446 (25.24) | -7.29 | 711 (21.10) | 800 (23.17) | -4.97 | 574 (31.14) | 1,320 (33.61) | -5.28 |
| Dyspnea | 2,792 (57.71) | 3,187 (55.62) | 4.22 | 1,903 (56.49) | 1,832 (53.06) | 6.90 | 1,462 (79.33) | 3,136 (79.86) | -1.32 |
| Hypertension | 3,874 (80.07) | 4,483 (78.24) | 4.52 | 2,699 (80.11) | 2,694 (78.02) | 5.15 | 1,559 (84.59) | 3,288 (83.73) | 2.36 |
| Ischemic heart disease | 1,752 (36.21) | 2,050 (35.78) | 0.91 | 1,199 (35.59) | 1,212 (35.10) | 1.02 | 884 (47.97) | 1,819 (46.32) | 3.30 |
| Peptic ulcer/GERD | 1,471 (30.41) | 1,712 (29.88) | 1.15 | 993 (29.47) | 992 (28.73) | 1.64 | 805 (43.68) | 1,639 (41.74) | 3.93 |
| Pneumonia | 441 (9.12) | 574 (10.02) | -3.07 | 218 (6.47) | 234 (6.78) | -1.23 | 703 (38.14) | 1,397 (35.57) | 5.33 |
| Tobacco usee | 2,926 (60.48) | 3,739 (65.25) | -9.89 | 1954 (58) | 2,146 (62.15) | -8.48 | 1,527 (82.85) | 3,299 (84.01) | -3.10 |
| Type 2 diabetes | 2,148 (44.40) | 2,353 (41.06) | 6.74 | 1,511 (44.85) | 1,438 (41.64) | 6.47 | 849 (46.07) | 1,781 (45.35) | 1.43 |
| **Baseline respiratory medication use, n (%)** |  |  |  |  |  |  |  |  |  |
| Bronchodilator naïvef | 3,140 (64.90) | 2,870 (50.09) | 30.31 | 2,247 (66.70) | 1,798 (52.07) | 30.12 | 947 (51.38) | 1,530 (38.96) | 25.16 |
| Maintenance therapy naïveg | 3,044 (62.92) | 2,781 (48.53) | 29.27 | 2,191 (65.03) | 1,744 (50.51) | 29.74 | 884 (47.97) | 1,387 (35.32) | 25.87 |
| Nebulized medication delivery | 1,025 (21.19) | 1,730 (30.19) | -20.72 | 596 (17.69) | 790 (22.88) | -12.93 | 994 (53.93) | 2,546 (64.83) | -22.33 |
| **Pharmacy claims, n (%)** |  |  |  |  |  |  |  |  |  |
| Controller medications | 1,793 (37.06) | 2,960 (51.66) | -29.70 | 1,178 (34.97) | 1,719 (49.78) | -30.33 | 964 (52.31) | 2,564 (65.29) | -26.62 |
| LAMAh | 1,083 (22.39) | 1,047 (18.27) | 10.23 | 713 (21.16) | 588 (17.03) | 10.53 | 512 (27.78) | 920 (23.43) | 9.99 |
| LAMA monotherapy | 1,039 (21.48) | 921 (16.07) | 13.87 | 684 (20.30) | 516 (14.94) | 14.10 | 481 (26.10) | 817 (20.80) | 12.52 |
| LABAh | 761 (15.73) | 2,284 (39.86) | -55.93 | 497 (14.75) | 1,322 (38.29) | -55.31 | 514 (27.89) | 1,961 (49.94) | -46.42 |
| ICSh | 818 (16.91) | 2,313 (40.37) | -53.73 | 519 (15.41) | 1,345 (38.95) | -54.88 | 562 (30.49) | 2,064 (52.56) | -45.94 |
| LABA/ICS combination (fixed dose) | 686 (14.18) | 2,149 (37.50) | -55.28 | 446 (13.24) | 1,247 (36.11) | -55.03 | 464 (25.18) | 1,838 (46.80) | -46.25 |
| Rescue medications | 2,922 (60.40) | 3,808 (66.46) | -12.61 | 1,892 (56.16) | 2,083 (60.32) | -8.45 | 1,516 (82.26) | 3,348 (85.26) | -8.14 |
| Oral corticosteroids | 1,671 (34.54) | 2,421 (42.25) | -15.91 | 728 (21.61) | 832 (24.09) | -5.92 | 1,470 (79.76) | 3,426 (87.24) | -20.26 |
| **Pharmacy claim count, mean (SD)** |  |  |  |  |  |  |  |  |  |
| Controller medications | 1.61 (3.02) | 2.41 (3.45) | -24.57 | 1.53 (2.98) | 2.30 (3.37) | -24.06 | 2.37 (3.47) | 3.15 (3.97) | -20.98 |
| LAMAh | 0.97 (2.41) | 0.63 (1.83) | 15.86 | 0.98 (2.47) | 0.61 (1.83) | 16.66 | 1.13 (2.48) | 0.70 (1.79) | 19.89 |
| LAMA monotherapy | 0.95 (2.40) | 0.59 (1.80) | 17.23 | 0.96 (2.47) | 0.57 (1.81) | 17.92 | 1.10 (2.47) | 0.65 (1.76) | 20.81 |
| LABAh | 0.54 (1.73) | 1.64 (2.86) | -46.73 | 0.47 (1.57) | 1.56 (2.77) | -48.25 | 0.91 (2.07) | 2.04 (3.05) | -43.13 |
| ICSh | 0.58 (1.77) | 1.70 (2.91) | -46.63 | 0.50 (1.62) | 1.62 (2.82) | -48.39 | 1.02 (2.20) | 2.18 (3.16) | -42.65 |
| LABA/ICS combination (fixed dose) | 0.49 (1.66) | 1.59 (2.84) | -46.91 | 0.43 (1.51) | 1.51 (2.75) | -48.40 | 0.85 (2.03) | 1.94 (3.03) | -42.54 |
| Rescue medications | 2.12 (3.60) | 2.53 (3.93) | -10.75 | 1.95 (3.49) | 2.21 (3.75) | -7.27 | 4.24 (5.15) | 4.76 (5.67) | -9.55 |
| Oral corticosteroids | 0.60 (1.31) | 0.76 (1.35) | -11.53 | 0.38 (1.06) | 0.43 (1.12) | -5.10 | 2.55 (2.92) | 3.05 (3.09) | -16.74 |
| **Medical claims, n (%)** |  |  |  |  |  |  |  |  |  |
| Controller medications | 73 (1.51) | 66 (1.15) | 3.12 | 48 (1.42) | 37 (1.07) | 3.18 | 51 (2.77) | 95 (2.42) | 2.19 |
| Rescue medications | 347 (7.17) | 498 (8.69) | -5.62 | 191 (5.67) | 221 (6.40) | -3.07 | 269 (14.60) | 637 (16.22) | -4.50 |
| **Medical claim count, mean (SD)** |  |  |  |  |  |  |  |  |  |
| Controller medications | 0.05 (0.72) | 0.05 (0.81) | -0.44 | 0.04 (0.55) | 0.04 (0.73) | -0.26 | 0.26 (2.18) | 0.14 (1.43) | 6.34 |
| Rescue medications | 0.16 (0.94) | 0.20 (1.05) | -3.95 | 0.12 (0.83) | 0.17 (1.04) | -4.51 | 0.42 (1.64) | 0.49 (1.80) | -3.49 |
| **Pharmacy and medical claim count, mean (SD)** |  |  |  |  |  |  |  |  |  |
| SAMA medications | 0.60 (2.09) | 0.66 (2.15) | -3.18 | 0.53 (2.03) | 0.59 (2.10) | -2.68 | 1.62 (3.24) | 1.84 (3.49) | -6.43 |
| **Any COPD exacerbation, n (%)** |  |  |  |  |  |  |  |  |  |
| ≥ 1 exacerbation | 1,469 (30.36) | 2,277 (39.74) | -19.74 | 0 (0.00) | 0 (0.00) | – | 1,843 (100.00) | 3,927 (100.00) | – |
| **Severe COPD exacerbationsi, n (%)** |  |  |  |  |  |  |  |  |  |
| ≥ 1 exacerbation | 159 (3.29) | 296 (5.17) | -9.35 | 0 (0.00) | 0 (0.00) | – | 1,120 (60.77) | 2,338 (59.54) | 2.52 |
| **All-cause utilization, n (%)** |  |  |  |  |  |  |  |  |  |
| Ambulatory visit | 4,776 (98.72) | 5,726 (99.93) | -14.83 | 3,307 (98.16) | 3,451 (99.94) | -18.46 | 1,840 (99.84) | 3,920 (99.82) | 0.38 |
| Emergency room visit | 1,715 (35.45) | 2,109 (36.81) | -2.83 | 1,099 (32.62) | 1,087 (31.48) | 2.45 | 1,365 (74.06) | 2,827 (71.99) | 4.68 |
| Hospitalization | 705 (14.57) | 779 (13.60) | 2.81 | 492 (14.60) | 430 (12.45) | 6.29 | 1,072 (58.17) | 2,170 (55.26) | 5.87 |
| Acute hospitalizationj | 694 (14.34) | 771 (13.46) | 2.57 | 485 (14.40) | 422 (12.22) | 6.41 | 1,068 (57.95) | 2,162 (55.05) | 5.84 |
| Other medical visitsk | 4,138 (85.53) | 4,938 (86.18) | -1.86 | 2,842 (84.36) | 2949 (85.40) | -2.92 | 1,699 (92.19) | 3,658 (93.15) | -3.70 |
| Pharmacy use | 4,826 (99.75) | 5,708 (99.62) | 2.42 | 3,357 (99.64) | 3,431 (99.36) | 4.00 | 1,843 (100.00) | 3,926 (99.97) | 2.26 |
| Count of pharmacy claims, mean (SD) | 46.69 (35.88) | 45.07 (35.89) | 4.52 | 45.51 (36.70) | 43.30 (37.05) | 5.98 | 61.13 (41.33) | 60.08 (44.37) | 2.43 |
| **COPD and/or pneumonia-related utilizationl, n (%)** |  |  |  |  |  |  |  |  |  |
| Ambulatory visit | 4,466 (92.31) | 5,485 (95.72) | -14.43 | 3,001 (89.08) | 3,224 (93.37) | -15.21 | 1,815 (98.48) | 3,877 (98.73) | -2.10 |
| Emergency room visit | 749 (15.48) | 1,059 (18.48) | -8.00 | 395 (11.72) | 412 (11.93) | -0.64 | 1,031 (55.94) | 2,311 (58.85) | -5.88 |
| Hospitalization | 478 (9.88) | 564 (9.84) | 0.12 | 313 (9.29) | 288 (8.34) | 3.35 | 1,052 (57.08) | 2,134 (54.34) | 5.52 |
| Acute hospitalizationj | 470 (9.71) | 560 (9.77) | -0.20 | 309 (9.17) | 284 (8.22) | 3.36 | 1,048 (56.86) | 2,123 (54.06) | 5.64 |
| Other medical visitsk | 1,457 (30.12) | 2,095 (36.56) | -13.71 | 902 (26.77) | 1,112 (32.20) | -11.93 | 1,154 (62.62) | 2,657 (67.66) | -10.60 |
| Pharmacy use | 4,278 (88.42) | 5,298 (92.46) | -13.76 | 2,818 (83.64) | 3,035 (87.89) | -12.19 | 1,824 (98.97) | 3,906 (99.47) | -5.63 |
| Count of pharmacy claims, mean (SD) | 5.51 (5.72) | 6.91 (6.34) | -23.11 | 4.70 (5.32) | 5.75 (5.93) | -18.79 | 12.29 (9.34) | 14.19 (10.07) | -19.58 |
| **COPD-related utilizationm, n (%)** |  |  |  |  |  |  |  |  |  |
| Ambulatory visit | 4,383 (90.60) | 5,423 (94.64) | -15.52 | 2,919 (86.64) | 3,165 (91.66) | -16.18 | 1,806 (97.99) | 3,866 (98.45) | -3.44 |
| Emergency room visit | 616 (12.73) | 938 (16.37) | -10.33 | 306 (9.08) | 358 (10.37) | -4.34 | 936 (50.79) | 2,156 (54.90) | -8.25 |
| Hospitalization | 406 (8.39) | 512 (8.94) | -1.93 | 267 (7.93) | 262 (7.59) | 1.26 | 1,043 (56.59) | 2,129 (54.21) | 4.79 |
| Acute hospitalizationj | 399 (8.25) | 509 (8.88) | -2.27 | 264 (7.84) | 259 (7.50) | 1.26 | 1,038 (56.32) | 2,118 (53.93) | 4.80 |
| Other medical visitsk | 1,361 (28.13) | 2,005 (34.99) | -14.80 | 838 (24.87) | 1,069 (30.96) | -13.60 | 1,115 (60.50) | 2,592 (66.00) | -11.44 |
| **Pneumonia-related utilizationn, n (%)** |  |  |  |  |  |  |  |  |  |
| Other medical visitk | 81 (1.67) | 105 (1.83) | -1.21 | 44 (1.31) | 48 (1.39) | -0.73 | 140 (7.60) | 223 (5.68) | 7.71 |
| **Hospitalization days (among patients with a hospitalization), mean (SD)** |  |  |  |  |  |  |  |  |  |
| All-cause | 10.12 (13.46) | 9.12 (11.20) | 8.07 | 10.35 (14.13) | 10.10 (12.60) | 1.84 | 14.19 (20.06) | 15.38 (21.15) | -5.79 |
| COPD and/or pneumonia-related | 9.18 (12.01) | 8.99 (11.21) | 1.63 | 9.15 (12.67) | 10.36 (12.99) | -9.44 | 13.84 (19.91) | 15.11 (20.89) | -6.21 |
| COPD-related | 8.47 (9.73) | 8.67 (10.45) | -2.02 | 8.22 (9.78) | 10.24 (12.54) | -17.93 | 13.72 (19.71) | 14.99 (20.79) | -6.27 |
| Pneumonia-related | 10.67 (14.09) | 10.79 (13.51) | -0.89 | 12.79 (16.30) | 12.53 (15.34) | 1.67 | 14.30 (23.06) | 15.40 (20.23) | -5.08 |
| COPD and/or pneumonia-attributable | 10.50 (14.53) | 9.62 (12.80) | 6.44 | 12.78 (17.23) | 11.48 (15.19) | 7.99 | 12.91 (19.26) | 14.16 (19.79) | -6.40 |
| **Total annual healthcare costs ($), mean (SD)** |  |  |  |  |  |  |  |  |  |
| All-cause | 16,309 (29,284) | 16,576 (28,174) | -0.93 | 16,391 (32,306) | 16,529 (30,684) | -0.44 | 32,488 (42,140) | 33,066 (41,604) | -1.38 |
| COPD and/or pneumonia-related | 4,263 (9,476) | 5,263 (11,732) | -9.38 | 3,864 (9,157) | 4,754 (11,648) | -8.50 | 18,992 (29,863) | 20,439 (28,570) | -4.95 |
| COPD-related | 3,827 (8,138) | 4,947 (10,307) | -12.06 | 3,473 (7,898) | 4,438 (9,503) | -11.03 | 18,593 (29,520) | 20,151 (28,352) | -5.38 |
| **Footnotes** |  |  |  |  |  |  |  |  |  |
| a Geographic region designated as resource scare by the Health Resources and Services Administration because of a shortage of providers to meet the needs of the population.  b Quan H, Li B, Couris CM, Fushimi K, Graham P, Hider P, Januel JM, Sundararajan V. Updating and validating the Charlson comorbidity index and score for risk adjustment in hospital discharge abstracts using data from 6 countries. Am J Epidemiology. 2011; 173(6): 676-82. | | | | | | | | | |
| c Weights are based on the likelihood of hospital mortality from Van Walraven C, Austin PC, Jenings A, Quan H, Forster AJ. A modification of the Elixhauser comorbidity measures into a point system for hospital death using administrative data. Med Care 2009;47(6):626-633. | | | | | | | | | |
| d Wu EQ, Birnbaum HG, Cifaldi M, et al. Development of a COPD severity score. Curr Med Res Opin. 2006;22(9):1679-87. | | | |  |  |  |  |  |  |
| e Based on diagnosis codes for current or prior tobacco use and pharmacy fills for smoking cessation treatments. | | | | | | | | | |
| f Naïve to LAMA and LABA during the baseline period |  |  |  |  |  |  |  |  |  |
| g Naïve to ICS, LAMA, and LABA during the baseline period |  |  |  |  |  |  |  |  |  |
| h Patients with free or fixed dose LAMA+LABA or ICS+LABA+LAMA maintenance therapy for ≥ 7 consecutive days of overlapping days' supply during the 6-months immediately before the index date were excluded. Patients could have free or fixed dose LAMA+LABA or ICS+LABA+LAMA during months 7-12 prior to the index date. | | | | | | | | | |
| i Defined as a hospitalization or an ER visit with a COPD diagnosis code in the primary position; or a hospitalization or an ER visit with a diagnosis code for acute respiratory failure in the primary position and a COPD diagnosis code in any position; or a hospitalization or an ER visit with a diagnosis code for acute respiratory failure in the primary position + an hospitalization or an ER visit within ±7 days with a COPD diagnosis code in any position. | | | | | | | | | |
| j Acute hospitalizations are hospitalization with at least one claim with a hospital place of service or provider specialty code. | | | |  |  |  |  |  |  |
| k Other medical visits may include services like independent laboratory, home health, durable medical equipment, etc. | | | |  |  |  |  |  |  |
| l Defined as utilization with a diagnosis for COPD, pneumonia, or acute bronchitis/bronchiolitis in any position or a pharmacy claim for a COPD-related treatment, including COPD-guideline recommended antibiotics. | | | | | | | | | |
| m Defined as utilization with a diagnosis for COPD in any position or a pharmacy claim for a COPD-related treatment, including COPD-guideline recommended antibiotics. | | | | | | |  |  |  |
| n Defined as utilization with a diagnosis code for pneumonia in any position. | | | | | | | | | |
